# Supplementary material
Source: publisher site journal article supplement (https://www.dovepress.com/article/460364)
Supplement: Supplementary file 1 [file get_supplementary_file.php]

## CONTEXT

|                                                                                                                                              |   |
|----------------------------------------------------------------------------------------------------------------------------------------------|---|
| <b>Fig S1.</b> Effect size plot for assessing the balance of groups divided according to systemic inflammatory response index quartiles..... | 2 |
| <b>Fig S2.</b> Plot estimating the pairwise minimum $p$ -values before and after weighting.....                                              | 3 |
| <b>Table S1.</b> In-hospital complications and definitions.....                                                                              | 4 |

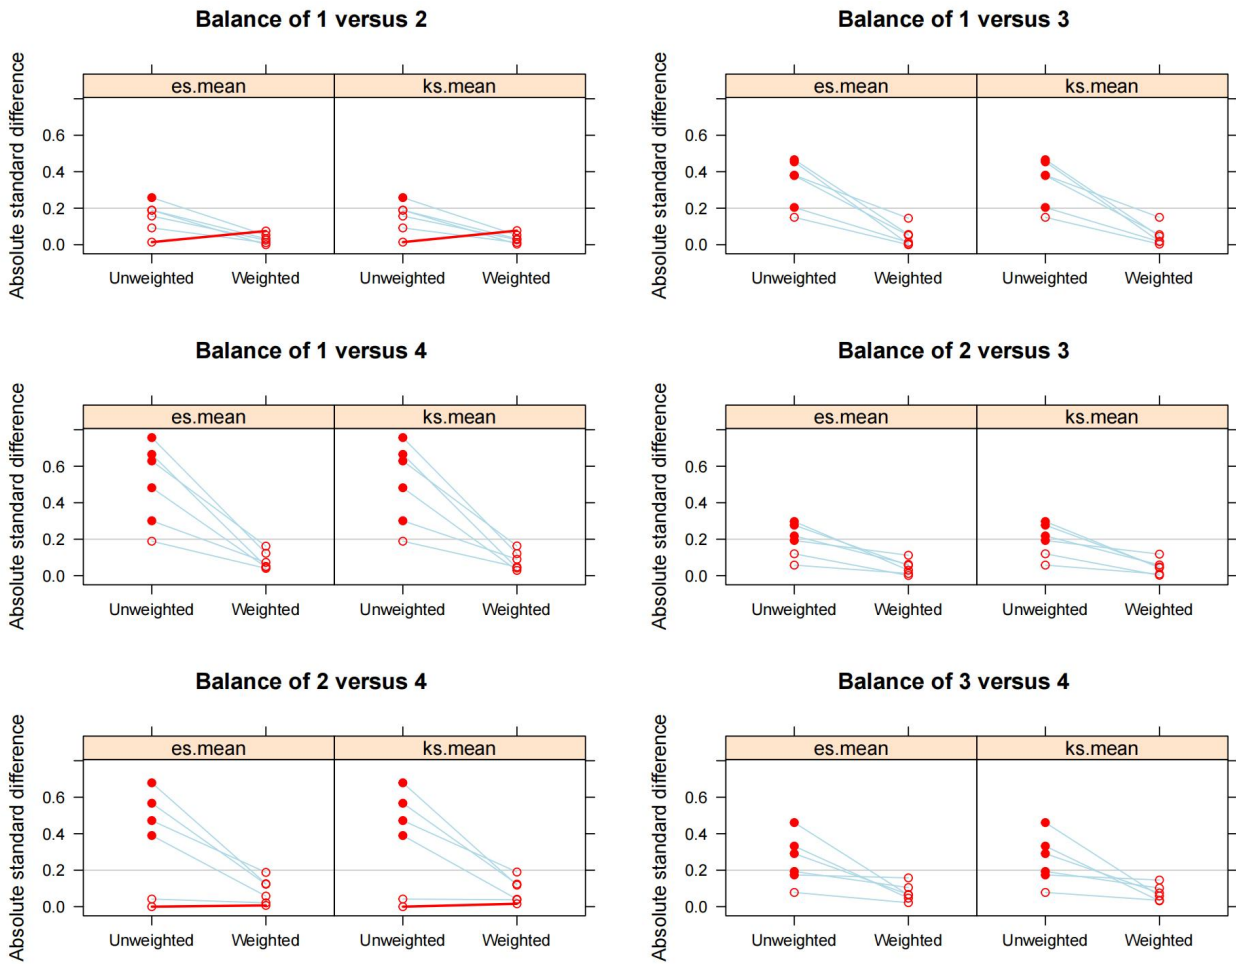

**Fig S1.** Effect size plot for assessing the balance of groups divided according to systemic inflammatory response index quartiles  
 After weighting, the absolute standardized mean differences among the exposure groups on the covariates decreased.

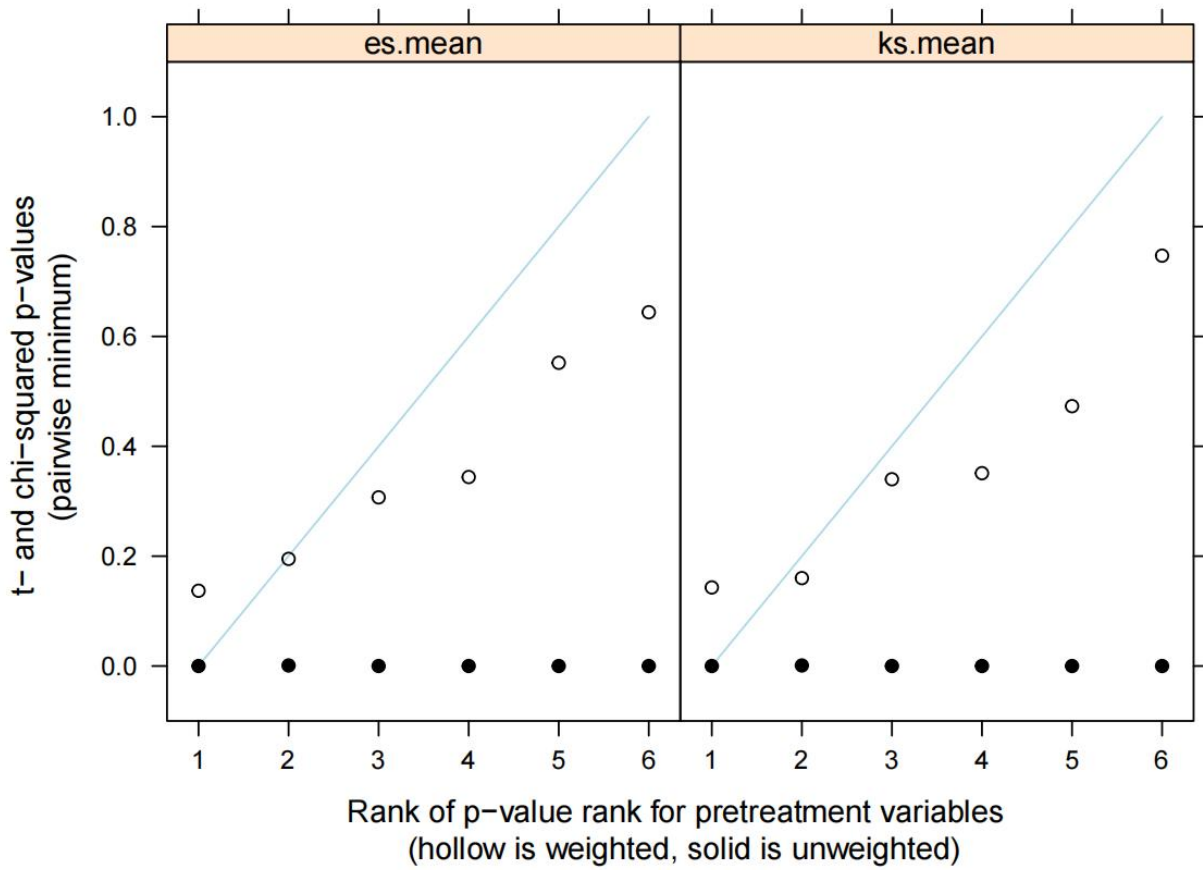

**Fig S2.** Plot estimating the pairwise minimum  $p$ -values before and after weighting

The Hollow dots were covariates after weighted, and the solid dots were covariates before weighted.

The pairwise minimum  $p$ -values all increased after weighting, which suggested a good balance for covariates in this study.

**Table S1. In-hospital complications and definitions**

| In-hospital complications | Definitions                                                                                                                                                                                                                                                                      |
|---------------------------|----------------------------------------------------------------------------------------------------------------------------------------------------------------------------------------------------------------------------------------------------------------------------------|
| SRGB                      | No previous history of gastrointestinal ulcer or hemorrhage, presented with hematemesis, red blood or “hemocult positive coffee grounded” materials in a nasogastric aspirate, or melena.                                                                                        |
| Liver dysfunction         | Bilirubin concentration >2 mg/dL and coagulation disorders with international normalized ratio > 1.5.                                                                                                                                                                            |
| MACEs                     | The occurrence of an arrhythmia, myocardial injury, acute heart failure, and cardiac arrest diagnosed by electrocardiogram or echocardiogram. <sup>1</sup>                                                                                                                       |
| DVT                       | Cross-sectional vein incompressibility, direct thrombus imaging with vein enlargement, and abnormal spectral and color-Doppler flow under venous ultrasound.                                                                                                                     |
| DCI                       | Occurrence within 4 to 14 days after onset: 1) new cerebral infarction identified on CT or MRI, after exclusion of procedure-related infarctions; 2) focal neurological or cognitive deficits, after exclusion of other potential causes of clinical deterioration. <sup>2</sup> |
| POP                       | Fever, increased white blood cell and C-reactive protein levels, and chest radiograph showed pulmonary infiltrates after surgery, according to the modified Centers for Disease Control and Prevention criteria. <sup>3</sup>                                                    |

**Abbreviations:** MACEs, Major adverse cardiac events; DCI, Delayed cerebral ischemia; SRGB, Stress related gastrointestinal bleeding; POP, Postoperative pneumonia; DVT, Deep vein thrombosis.

**References:**

1. Mangano DT, Browner WS, Hollenberg M, London MJ, Tubau JF, Tateo IM. Association of perioperative myocardial ischemia with cardiac morbidity and mortality in men undergoing noncardiac surgery. The Study of Perioperative Ischemia Research Group. *N Engl J Med*. 1990;323(26):1781-1788.
2. Vergouwen MD, Vermeulen M, van Gijn J, Rinkel GJ, Wijdicks EF, Muizelaar JP, et al. Definition of delayed cerebral ischemia after aneurysmal subarachnoid hemorrhage as an outcome event in clinical trials and observational studies: proposal of a multidisciplinary research group. *Stroke*. 2010;41(10):2391-2395.
3. Smith CJ, Kishore AK, Vail A, Chamorro A, Garau J, Hopkins SJ, et al. Diagnosis of Stroke-Associated Pneumonia: Recommendations From the Pneumonia in Stroke Consensus Group. *Stroke*. 2015;46(8):2335-2340.
